# Supplementary material for: The Macroeconomic Impact of Social Unrest
Source: publisher site journal article supplement (doi:10.1515/bejm-2022-0039), 2023-01-26
Supplement: Supplementary file 1 [file j_bejm-2022-0039_suppl.pdf]

## ANNEX 1: Additional IV Results

This annex presents results from instrumental variables (IV) estimations for the key exercises presented in the paper. In particular, it shows results for sectoral value added, demand components, and confidence indicators to changes in the RSUI index and to RSUI-identified unrest events. It also depicts the impact of changes in the RSUI on GDP by income level groups. Results are shown for the instrument that is closest to the one proposed by Acemoglu et al. (2019): unrest at the regional level.

### A1. 1. Agriculture Value Added

#### Panel A. Response to a one st. dev. Change in RSUI

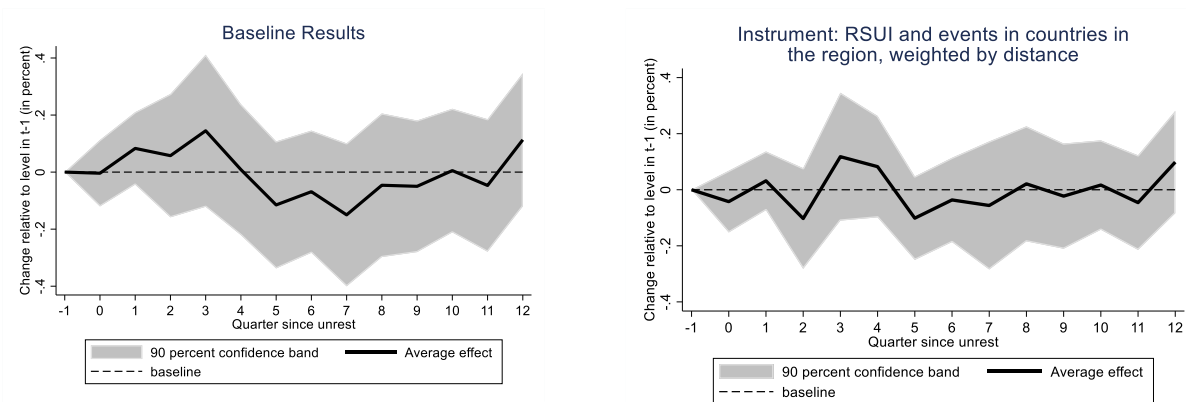

#### Panel B. Response to a RSUI-Implied Event

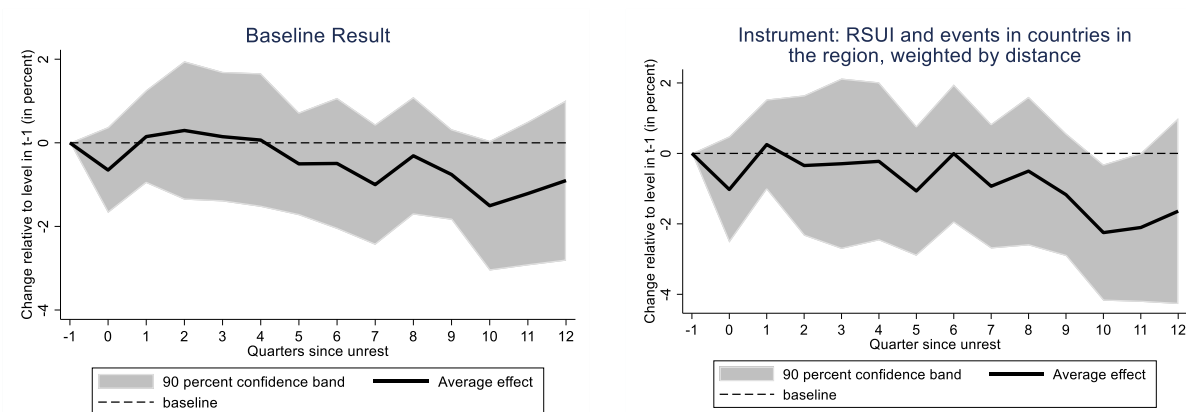

Note: Standard errors are clustered at the country and year level.

## A1. 2. Manufacturing Value Added

### Panel A. Response to a one st. dev. Change in RSUI

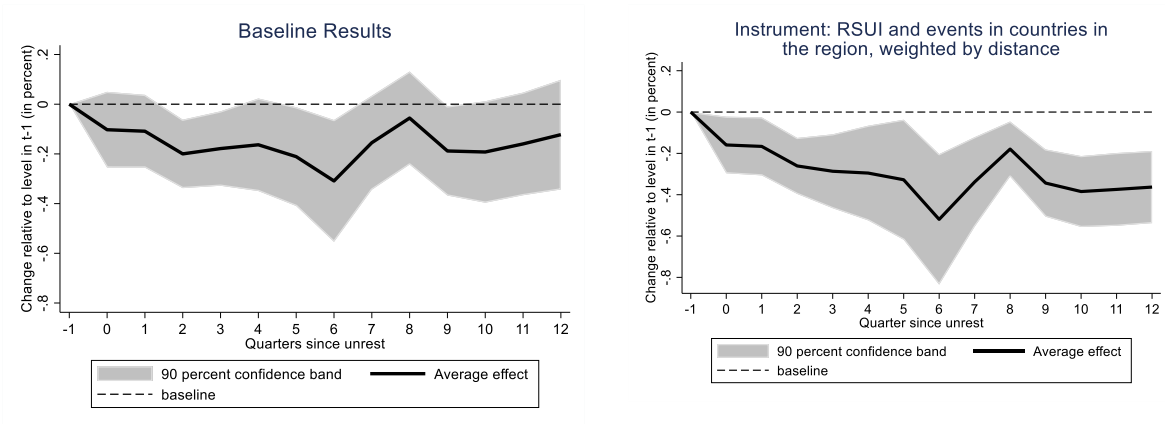

### Panel B. Response to a RSUI-Implied Event

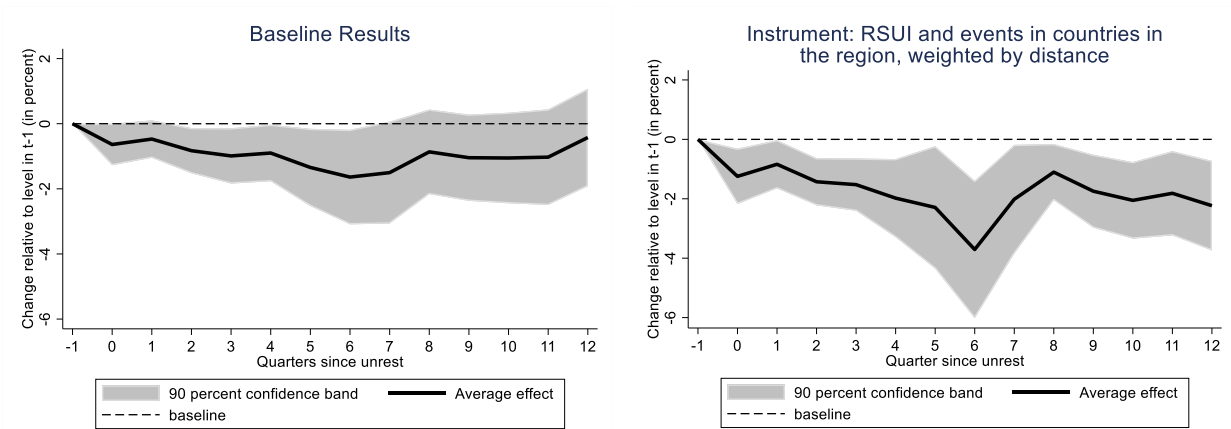

Note: Standard errors are clustered at the country and year level.

### A1. 3. Services Value Added

#### Panel A. Response to a one st. dev. Change in RSUI

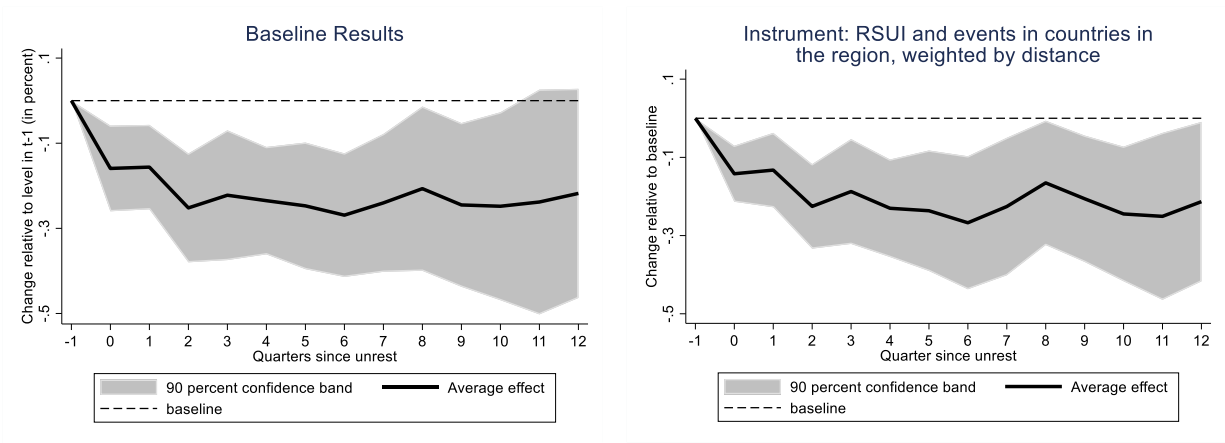

#### Panel B. Response to a RSUI-Implied Event

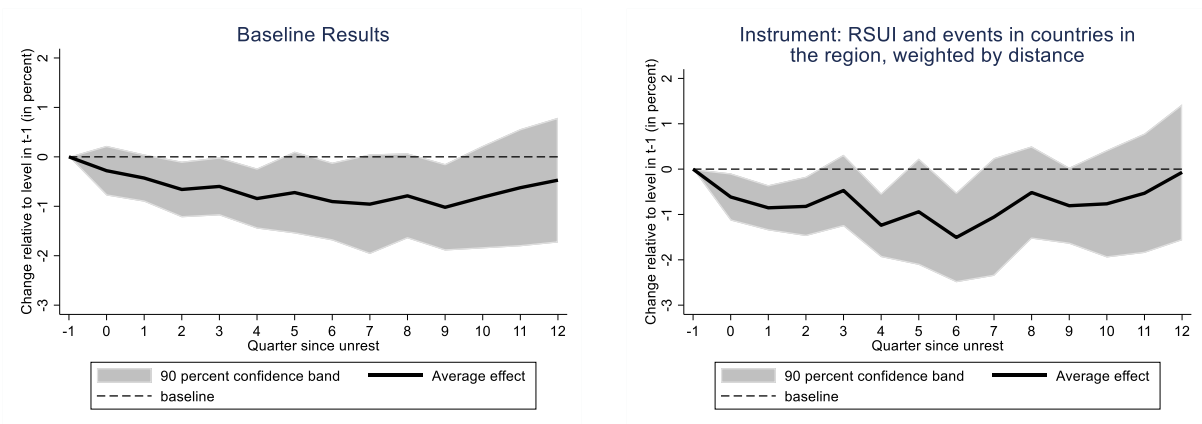

Note: Standard errors are clustered at the country and year level.

## A1. 4. Consumption

### Panel A. Response to a one st. dev. Change in RSUI

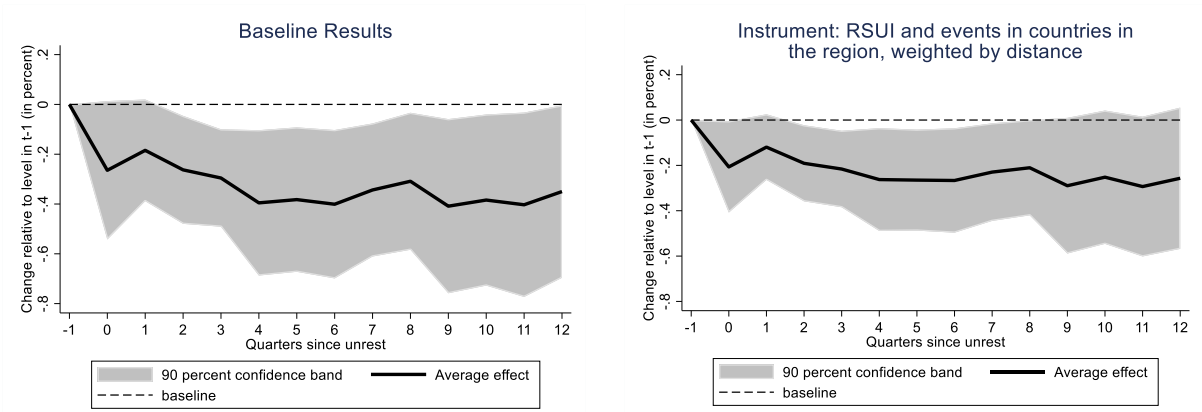

### Panel B. Response to a RSUI-Implied Event

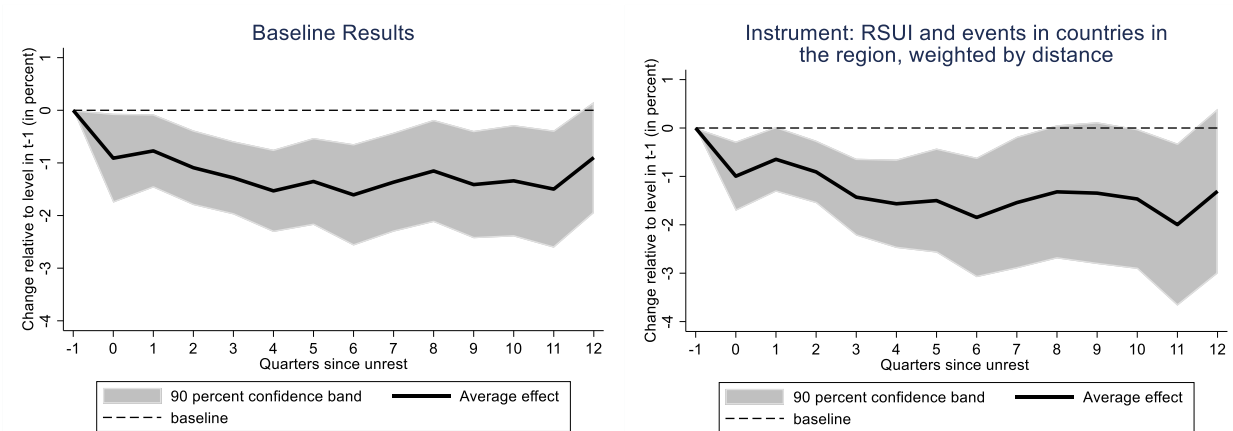

Note: Standard errors are clustered at the country and year level.

## A1. 5. Investment

### Panel A. Response to a one st. dev. Change in RSUI

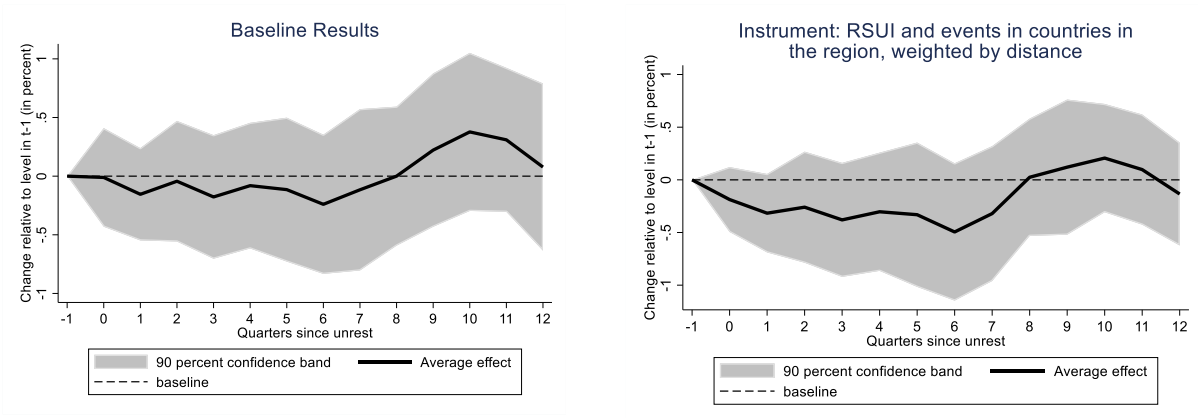

### Panel B. Response to a RSUI-Implied Event

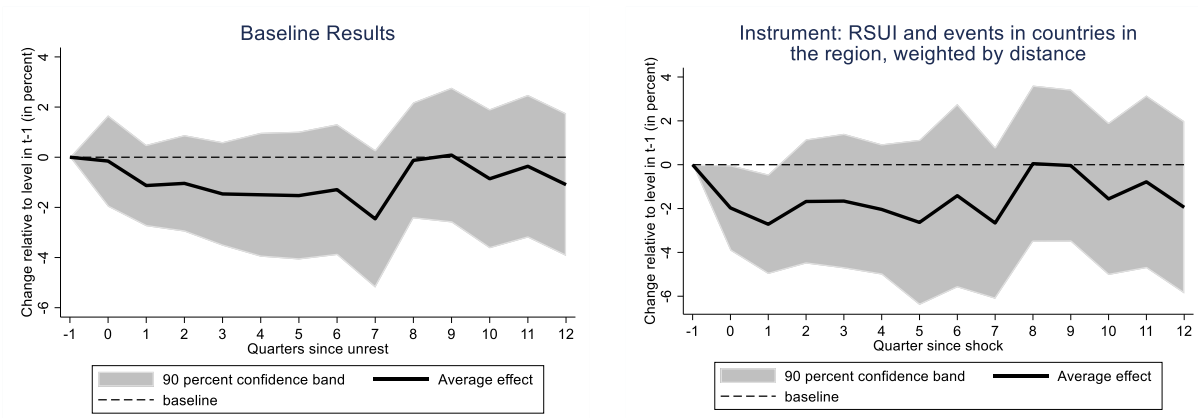

Note: Standard errors are clustered at the country and year level.

## A1. 6. Exports and Imports

### Panel A. Response to a one st. dev. Change in RSUI

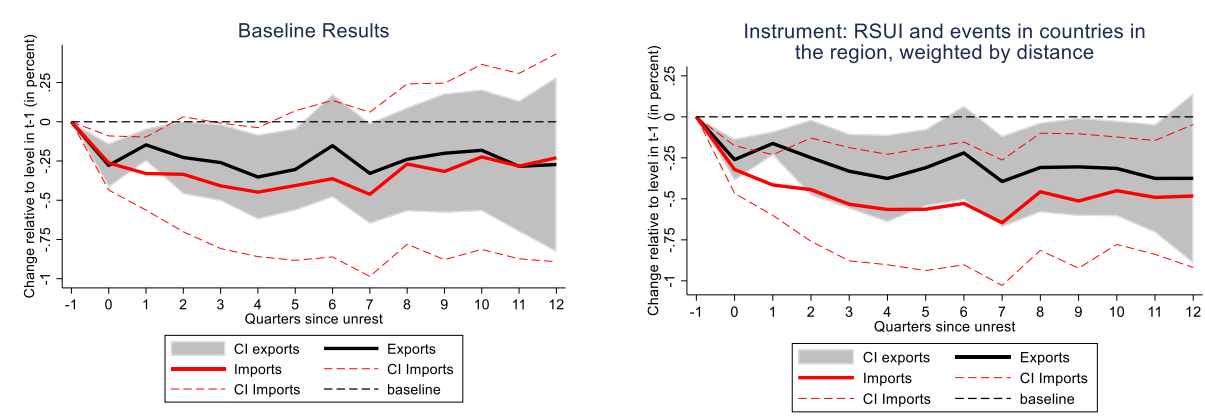

### Panel B. Exports: Response to a RSUI-Implied Event

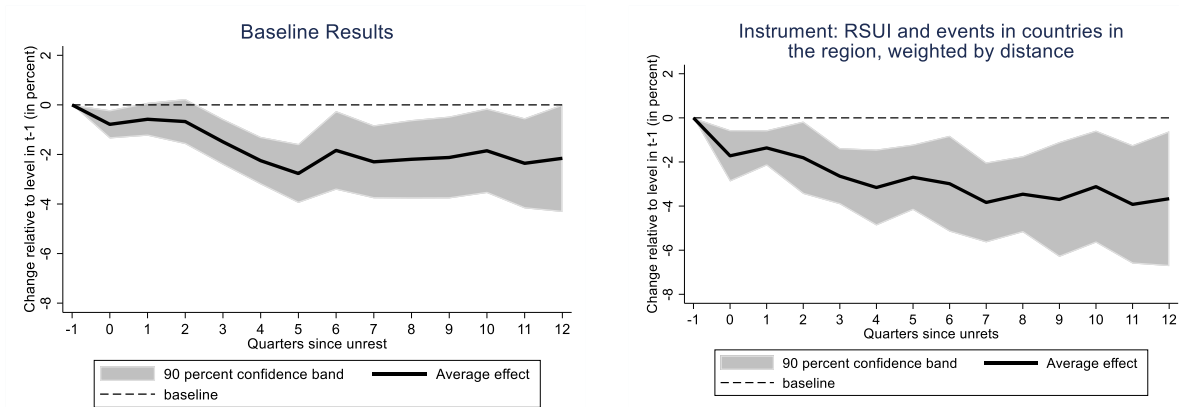

### Panel B. Imports: Response to a RSUI-Implied Event

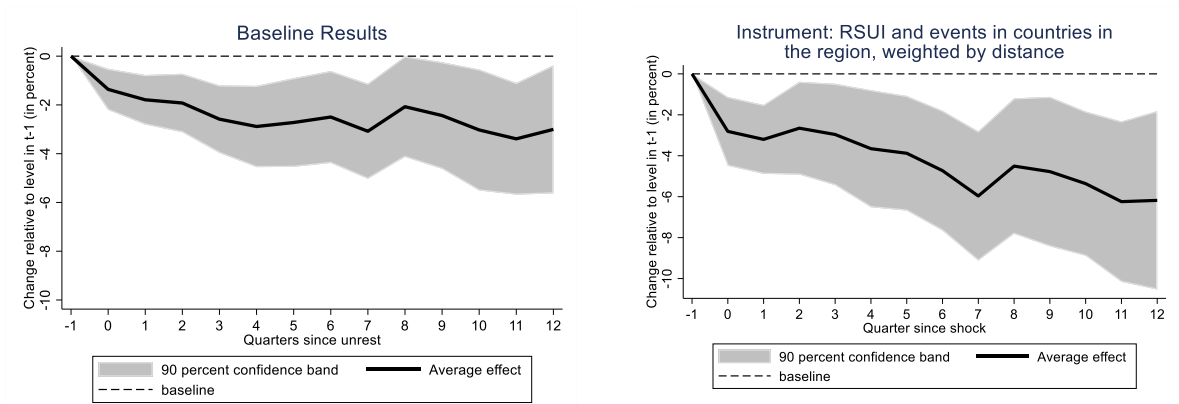

Note: Standard errors are clustered at the country and year level.

## A1. 7. Business Confidence

### Panel A. Response to a one st. dev. Change in RSUI

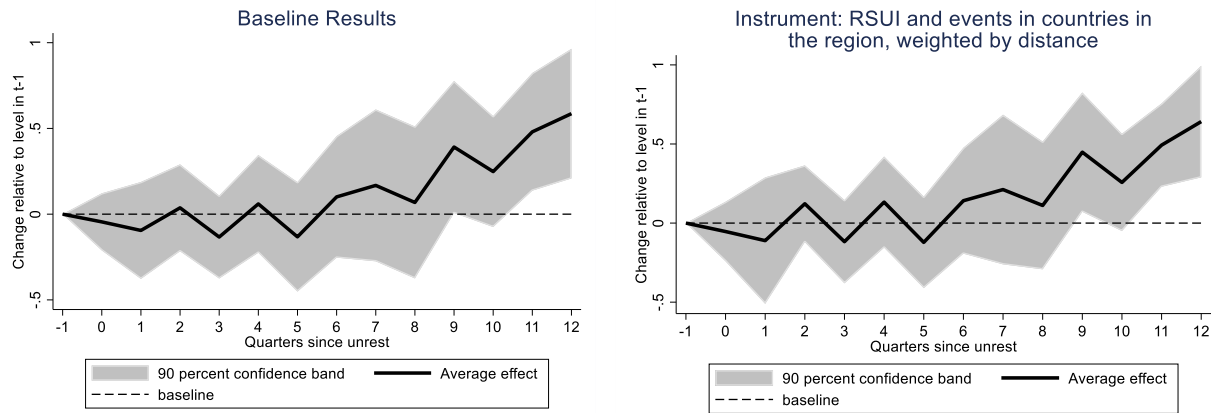

### Panel B. Exports: Response to a RSUI-Implied Event

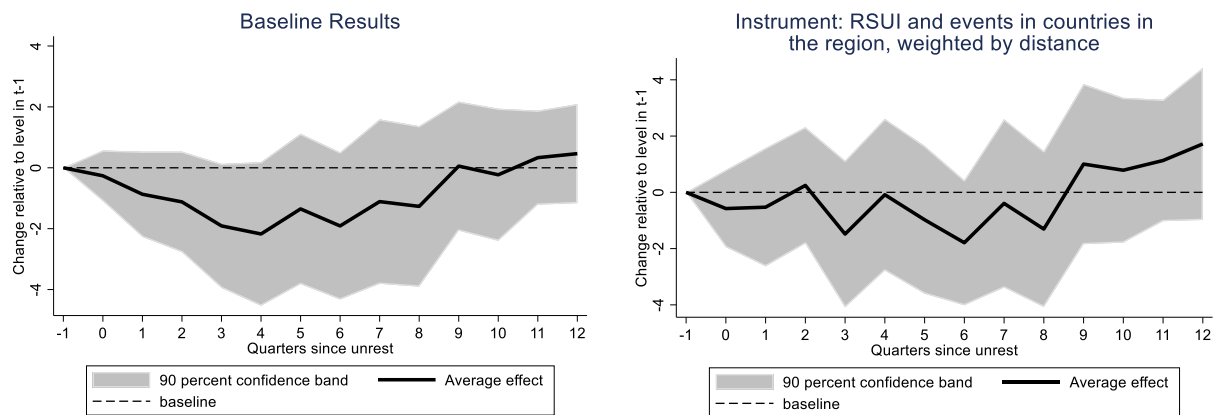

Note: Standard errors are clustered at the country and year level.

## A1. 8. Consumer Confidence

### Panel A. Response to a one st. dev. Change in RSUI

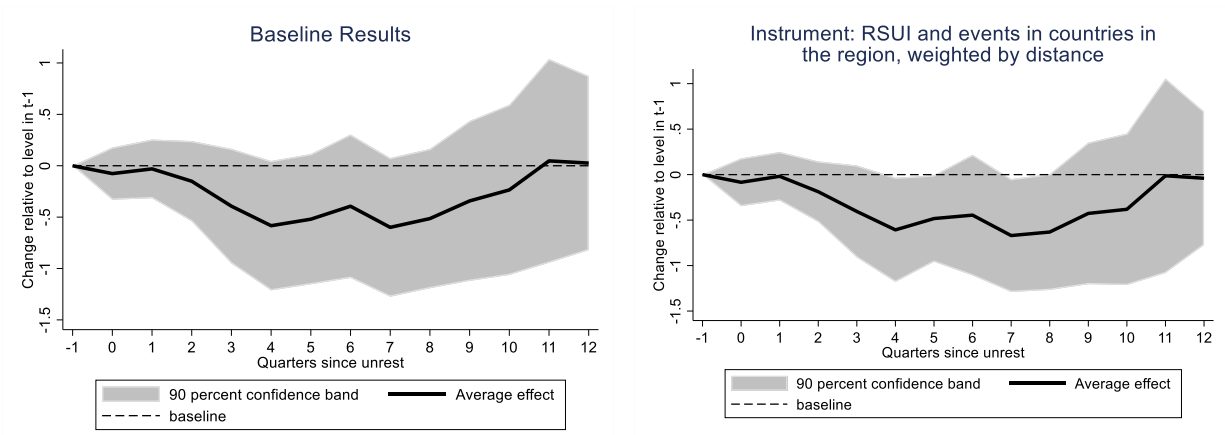

### Panel B. Response to a RSUI-Implied Event

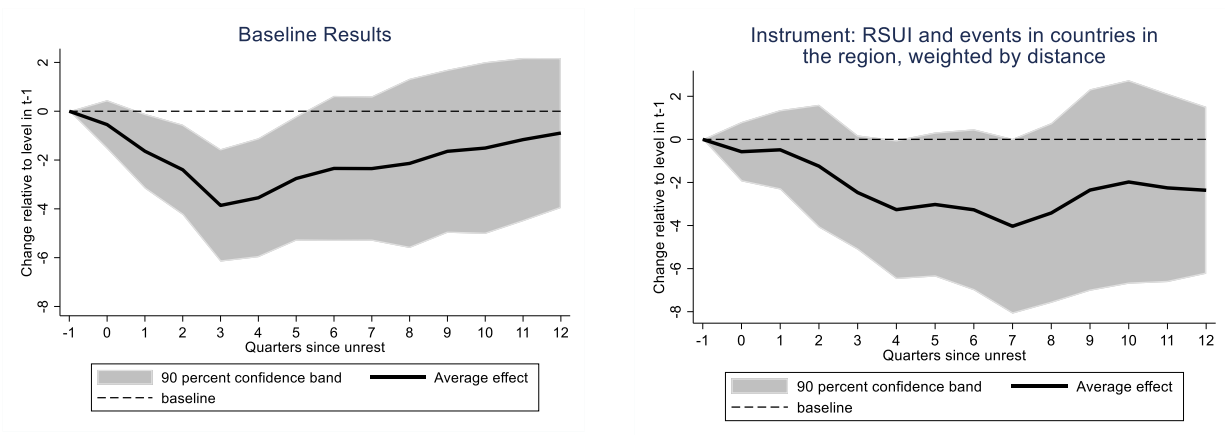

Note: Standard errors are clustered at the country and year level.



## A1. 9. World Uncertainty Index

### Response to a one st. dev. Change in RSUI

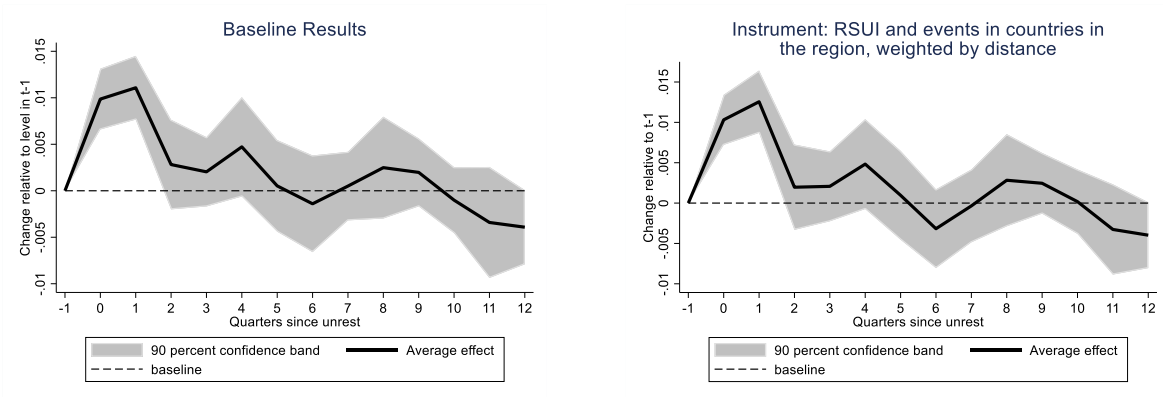

Note: Standard errors are clustered at the country and year level.

## A1. 10. Impact by Income Level Groups

### Panel A. Advanced Economies

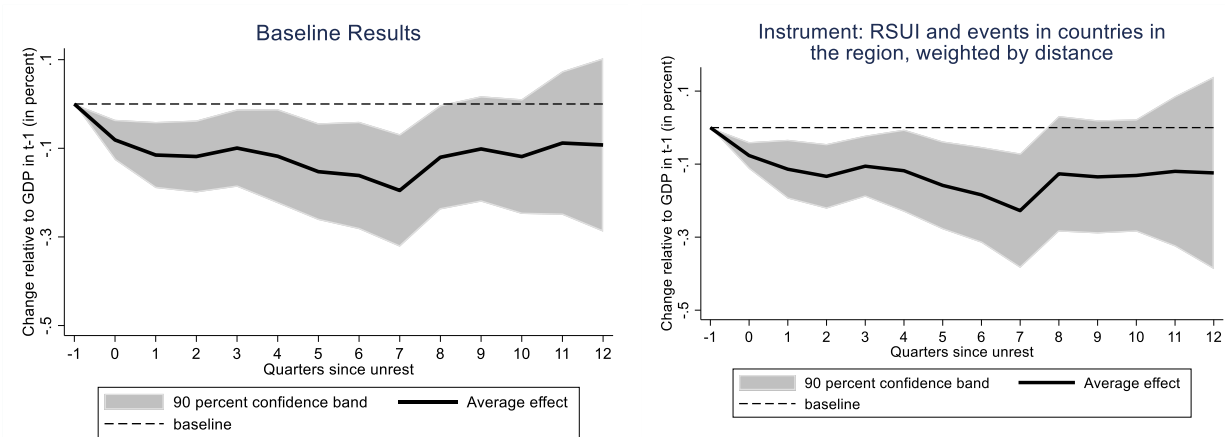

### Panel B. Emerging Markets

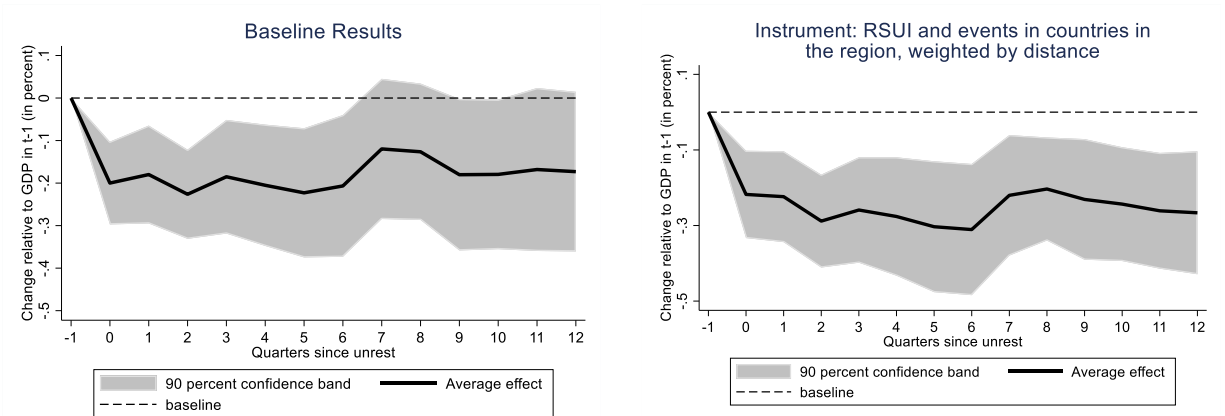

Note: Standard errors are clustered at the country and year level.
